# Supplementary material for: Exploring the Development of Astrobiology Scientific Research through Bibliometric Network Analysis: A Focus on Biomining and Bioleaching
Source: MDPI journal article supplement (doi:10.3390/min13060797), 2023-06-11
Supplement: s1 [file s1]

# Supplementary Materials:

**Table S1.** Clusters and keywords resulting from the analysis of keywords for the string “astrobiology”.

| Cluster | Color | Keywords                      | Links | Total Link Strength | Occurrences |
|---------|-------|-------------------------------|-------|---------------------|-------------|
| 1       | Red   | adaptation                    | 96    | 244                 | 19          |
|         |       | antarctica                    | 111   | 289                 | 24          |
|         |       | archaea                       | 116   | 409                 | 28          |
|         |       | archaeon                      | 112   | 390                 | 26          |
|         |       | article                       | 173   | 1517                | 137         |
|         |       | bacteria                      | 169   | 1158                | 81          |
|         |       | bacteria (microorganisms)     | 98    | 204                 | 19          |
|         |       | bacterium                     | 162   | 1154                | 76          |
|         |       | biodiversity                  | 118   | 366                 | 25          |
|         |       | biomass                       | 75    | 163                 | 17          |
|         |       | biosphere                     | 97    | 207                 | 22          |
|         |       | biotechnology                 | 77    | 195                 | 20          |
|         |       | classification                | 94    | 320                 | 18          |
|         |       | controlled study              | 112   | 417                 | 36          |
|         |       | cosmic radiation              | 115   | 335                 | 31          |
|         |       | cyanobacteria                 | 99    | 292                 | 27          |
|         |       | cyanobacterium                | 104   | 328                 | 27          |
|         |       | desert climate                | 102   | 279                 | 17          |
|         |       | dna                           | 84    | 217                 | 24          |
|         |       | ecosystem                     | 138   | 597                 | 45          |
|         |       | extreme environment           | 122   | 367                 | 32          |
|         |       | extreme environments          | 94    | 220                 | 17          |
|         |       | extremophile                  | 108   | 333                 | 31          |
|         |       | extremophiles                 | 120   | 485                 | 61          |
|         |       | fluorescence                  | 91    | 159                 | 21          |
|         |       | fungi                         | 109   | 323                 | 30          |
|         |       | fungus                        | 98    | 264                 | 22          |
|         |       | genetics                      | 142   | 769                 | 57          |
|         |       | growth, development and aging | 123   | 399                 | 29          |
|         |       | habitat                       | 103   | 242                 | 18          |
|         |       | ionizing radiation            | 81    | 172                 | 23          |
|         |       | isolation and purification    | 136   | 724                 | 47          |
|         |       | lakes                         | 72    | 186                 | 17          |
|         |       | metabolism                    | 169   | 1135                | 100         |
|         |       | microbial community           | 98    | 334                 | 31          |
|         |       | microbial viability           | 77    | 216                 | 18          |
|         |       | microbiology                  | 161   | 1123                | 85          |
|         |       | microbiota                    | 124   | 488                 | 35          |
| 2       | Green | amino acid                    | 108   | 328                 | 32          |
|         |       | amino acids                   | 104   | 292                 | 37          |
|         |       | astrobiology                  | 199   | 9156                | 1513        |
|         |       | astrochemistry                | 70    | 406                 | 119         |
|         |       | astrophysics                  | 69    | 186                 | 47          |

|                     |      |                                                  |     |      |     |
|---------------------|------|--------------------------------------------------|-----|------|-----|
| 3                   | Blue | biology                                          | 121 | 307  | 59  |
|                     |      | carbon dioxide                                   | 137 | 433  | 48  |
|                     |      | chemical analysis                                | 81  | 169  | 20  |
|                     |      | cosmology                                        | 71  | 192  | 39  |
|                     |      | dust                                             | 109 | 224  | 21  |
|                     |      | earth                                            | 103 | 263  | 43  |
|                     |      | earth (planet)                                   | 179 | 1179 | 115 |
|                     |      | enceladus                                        | 76  | 221  | 27  |
|                     |      | europa                                           | 99  | 287  | 39  |
|                     |      | extrasolar planets                               | 65  | 229  | 42  |
|                     |      | extraterrestrial life                            | 113 | 318  | 51  |
|                     |      | geochemistry                                     | 81  | 165  | 24  |
|                     |      | hydrogen                                         | 124 | 333  | 29  |
|                     |      | ice                                              | 129 | 491  | 54  |
|                     |      | intelligence                                     | 57  | 127  | 17  |
|                     |      | interplanetary flight                            | 65  | 198  | 32  |
|                     |      | irradiation                                      | 92  | 152  | 17  |
|                     |      | ism: molecules                                   | 24  | 192  | 59  |
|                     |      | jupiter                                          | 82  | 219  | 20  |
|                     |      | life detection                                   | 109 | 354  | 46  |
|                     |      | martian surface analysis                         | 55  | 132  | 29  |
|                     |      | mass spectrometry                                | 103 | 322  | 45  |
|                     |      | methane                                          | 124 | 486  | 47  |
|                     |      | methods: numerical                               | 21  | 128  | 47  |
|                     |      | molecular processes                              | 31  | 132  | 36  |
|                     |      | molecules                                        | 69  | 260  | 52  |
|                     |      | moon                                             | 136 | 509  | 57  |
|                     |      | nasa                                             | 73  | 189  | 41  |
|                     |      | nitrogen                                         | 116 | 278  | 26  |
|                     |      | oceans and seas                                  | 110 | 454  | 34  |
|                     |      | orbits                                           | 66  | 329  | 66  |
|                     |      | planetary atmosphere                             | 79  | 212  | 25  |
|                     |      | planetary exploration                            | 98  | 246  | 27  |
|                     |      | planetary systems                                | 33  | 120  | 53  |
|                     |      | planets                                          | 175 | 1693 | 181 |
|                     |      | planets and satellites: at-<br>mospheres         | 32  | 285  | 99  |
|                     |      | planets and satellites: ter-<br>restrial planets | 23  | 239  | 80  |
|                     |      | prebiotic chemistry                              | 74  | 216  | 42  |
|                     |      | satellites                                       | 52  | 213  | 33  |
|                     |      | saturn                                           | 97  | 313  | 24  |
| sea                 | 114  | 501                                              | 38  |      |     |
| seti                | 55   | 180                                              | 42  |      |     |
| solar system        | 151  | 573                                              | 69  |      |     |
| space research      | 67   | 172                                              | 36  |      |     |
| stars               | 55   | 289                                              | 57  |      |     |
| terrestrial planets | 35   | 156                                              | 26  |      |     |
| thermodynamics      | 110  | 278                                              | 30  |      |     |
| basalt              | 97   | 289                                              | 23  |      |     |
| biological marker   | 113  | 394                                              | 26  |      |     |

|   |        |                              |     |      |     |
|---|--------|------------------------------|-----|------|-----|
| 4 | Yellow | biomarker                    | 100 | 193  | 17  |
|   |        | biomarkers                   | 125 | 455  | 40  |
|   |        | biosignature                 | 81  | 200  | 22  |
|   |        | carbon                       | 126 | 325  | 29  |
|   |        | chemistry                    | 183 | 3390 | 274 |
|   |        | devices                      | 147 | 850  | 62  |
|   |        | fossil                       | 108 | 400  | 30  |
|   |        | fossils                      | 107 | 391  | 28  |
|   |        | geologic sediments           | 132 | 795  | 55  |
|   |        | heat                         | 101 | 253  | 18  |
|   |        | iron                         | 123 | 409  | 39  |
|   |        | mars                         | 187 | 3266 | 348 |
|   |        | mass fragmentography         | 82  | 238  | 17  |
|   |        | meteoroids                   | 94  | 287  | 28  |
|   |        | mineral                      | 135 | 681  | 52  |
|   |        | minerals                     | 128 | 600  | 53  |
|   |        | organic chemicals            | 98  | 348  | 26  |
|   |        | organic compound             | 108 | 437  | 36  |
|   |        | oxidation reduction reaction | 90  | 270  | 21  |
|   |        | oxidation-reduction          | 88  | 259  | 19  |
|   |        | perchlorate                  | 71  | 210  | 20  |
|   |        | procedures                   | 178 | 2282 | 178 |
|   |        | raman spectrometry           | 100 | 378  | 31  |
|   |        | raman spectroscopy           | 90  | 259  | 33  |
|   |        | sediment                     | 142 | 897  | 63  |
|   |        | silicate                     | 116 | 414  | 30  |
|   |        | silicates                    | 116 | 392  | 34  |
|   |        | silicon dioxide              | 101 | 302  | 22  |
|   |        | space simulation             | 97  | 331  | 23  |
|   |        | spectrum analysis, raman     | 97  | 367  | 30  |
|   |        | animal                       | 80  | 254  | 24  |
|   |        | animals                      | 80  | 254  | 24  |
|   |        | biogenesis                   | 160 | 901  | 88  |
|   |        | biological evolution         | 107 | 425  | 38  |
|   |        | environment                  | 98  | 223  | 18  |
|   |        | evolution                    | 139 | 661  | 74  |
|   |        | evolution, chemical          | 84  | 253  | 20  |
|   |        | exobiology                   | 194 | 6083 | 550 |
|   |        | geology                      | 116 | 299  | 32  |
|   |        | government                   | 95  | 354  | 25  |
|   |        | history                      | 75  | 226  | 26  |
|   |        | human                        | 153 | 1200 | 110 |
|   |        | humans                       | 136 | 801  | 72  |
|   |        | life                         | 147 | 663  | 62  |
|   |        | note                         | 92  | 271  | 22  |
|   |        | origin of life               | 166 | 1072 | 124 |
|   |        | planetary science            | 105 | 387  | 38  |
|   |        | priority journal             | 165 | 1287 | 98  |
|   |        | robotics                     | 85  | 226  | 30  |
|   |        | scientist                    | 84  | 287  | 21  |

|   |            |                                                                       |     |      |     |
|---|------------|-----------------------------------------------------------------------|-----|------|-----|
|   |            | space flight                                                          | 183 | 1876 | 159 |
|   |            | spacecraft                                                            | 141 | 762  | 61  |
|   |            | telescope                                                             | 79  | 293  | 19  |
|   |            | telescopes                                                            | 79  | 241  | 25  |
|   |            | trends                                                                | 74  | 225  | 20  |
|   |            | united states                                                         | 113 | 464  | 39  |
|   |            | united states national aero-<br>nautics and space admin-<br>istration | 93  | 328  | 22  |
|   |            | venus                                                                 | 62  | 147  | 22  |
|   |            | volcano                                                               | 97  | 241  | 17  |
| 5 | Violet     | analysis                                                              | 112 | 383  | 26  |
|   |            | astronomy                                                             | 193 | 5580 | 507 |
|   |            | atmosphere                                                            | 170 | 1320 | 98  |
|   |            | biosignatures                                                         | 145 | 769  | 83  |
|   |            | climate                                                               | 100 | 337  | 31  |
|   |            | evolution, planetary                                                  | 80  | 266  | 22  |
|   |            | exoplanets                                                            | 95  | 490  | 68  |
|   |            | extraterrestrial environ-<br>ment                                     | 192 | 4318 | 346 |
|   |            | gas                                                                   | 96  | 298  | 20  |
|   |            | gases                                                                 | 77  | 250  | 22  |
|   |            | habitability                                                          | 136 | 610  | 82  |
|   |            | microclimate                                                          | 130 | 461  | 34  |
|   |            | models, theoretical                                                   | 124 | 556  | 46  |
|   |            | oxygen                                                                | 114 | 409  | 32  |
|   |            | planet                                                                | 71  | 178  | 17  |
|   |            | remote sensing                                                        | 79  | 174  | 23  |
|   |            | space                                                                 | 191 | 4135 | 336 |
|   |            | spectroscopy                                                          | 124 | 462  | 50  |
|   |            | spectrum analysis                                                     | 96  | 298  | 24  |
|   |            | stars, celestial                                                      | 71  | 259  | 22  |
|   |            | temperature                                                           | 164 | 789  | 71  |
|   |            | theoretical model                                                     | 130 | 574  | 47  |
|   |            | time factor                                                           | 97  | 344  | 27  |
|   |            | time factors                                                          | 99  | 365  | 30  |
|   |            | water                                                                 | 169 | 1186 | 88  |
| 6 | Light Blue | earth, planet                                                         | 142 | 654  | 56  |

**Table S2.** Clusters and keywords resulting from the analysis of keywords for the string “astrobiology” AND “biomining” OR “bioleaching”.

| Cluster | Color  | Label                          | Links | Total Link Strength | Occurrences |
|---------|--------|--------------------------------|-------|---------------------|-------------|
| 1       | Red    | acidophile                     | 26    | 30                  | 2           |
|         |        | astrobiology                   | 28    | 52                  | 5           |
|         |        | astronomy                      | 26    | 31                  | 2           |
|         |        | bacteria                       | 11    | 15                  | 2           |
|         |        | bioleaching                    | 29    | 46                  | 4           |
|         |        | earth (planet)                 | 9     | 10                  | 2           |
|         |        | international space station    | 10    | 11                  | 2           |
|         |        | iron                           | 27    | 41                  | 3           |
|         |        | metabolism                     | 22    | 34                  | 4           |
|         |        | microbiology                   | 27    | 38                  | 3           |
|         |        | minerals                       | 25    | 26                  | 2           |
| 2       | Green  | extreme environment            | 15    | 19                  | 2           |
|         |        | extremophiles                  | 11    | 11                  | 2           |
|         |        | hydrogen-ion concentration     | 26    | 42                  | 3           |
|         |        | microbial metabolism           | 26    | 31                  | 2           |
|         |        | nonhuman                       | 28    | 50                  | 4           |
|         |        | ph                             | 26    | 42                  | 3           |
|         |        | proteobacteria                 | 26    | 31                  | 2           |
| 3       | Blue   | acidophiles                    | 24    | 31                  | 3           |
|         |        | geomicrobiology                | 24    | 26                  | 2           |
|         |        | iberian pyrite belt            | 23    | 28                  | 2           |
|         |        | iron cycle                     | 23    | 28                  | 2           |
|         |        | mars                           | 27    | 39                  | 4           |
|         |        | río tinto                      | 23    | 28                  | 2           |
|         |        | sulfur cycle                   | 23    | 28                  | 2           |
| 4       | Yellow | acidithiobacillus              | 25    | 34                  | 2           |
|         |        | acidithiobacillus ferrooxidans | 25    | 34                  | 2           |
|         |        | mineral                        | 25    | 34                  | 2           |
|         |        | sulfide                        | 25    | 34                  | 2           |
|         |        | sulfur                         | 25    | 34                  | 2           |
